# Supplementary material for: Bulk and interfacial engineering of Ta3N5 nanotube arrays by Sn(iv) doping, proper passivation and co-catalysts for efficient solar water oxidation
Source: Royal Society of Chemistry journal article supplement (doi:10.1039/d2cy01232d), 2022-01-01
Supplement: d2cy01232d1.pdf [file d2cy01232d1.pdf]

## Supporting Information

### **Bulk and Interfacial Engineering of Ta<sub>3</sub>N<sub>5</sub> Nanotube Arrays by Sn(IV) Doping, Proper Passivation and Co-Catalyst for Efficient Solar Water Oxidation**

Pran Krisna Das,<sup>a</sup> Maheswari Arunachalam,<sup>b</sup> Ramesh Poonchi Sivasankaran,<sup>b</sup> Kwang-Soon Ahn,<sup>c</sup>  
Jun-Seok Ha<sup>d</sup> and Soon Hyung Kang<sup>b,\*</sup>

<sup>a</sup>*Department of Advanced Chemicals and Engineering, Chonnam National University, Gwangju 61186, South of Korea*

<sup>b</sup>*Department of Chemistry Education and Optoelectronic Convergence Research Center, Chonnam National University, Gwangju 61186, South of Korea*

<sup>c</sup>*Department of Chemical Engineering, Yeungnam University, Gyeongsan 712-749, South Korea*

<sup>d</sup>*Department of Chemical Engineering, Chonnam National University, Gwangju 61186, South of Korea*

\* E-mail: [skang@jnu.ac.kr](mailto:skang@jnu.ac.kr) ; Tel: +82-62-530-2497

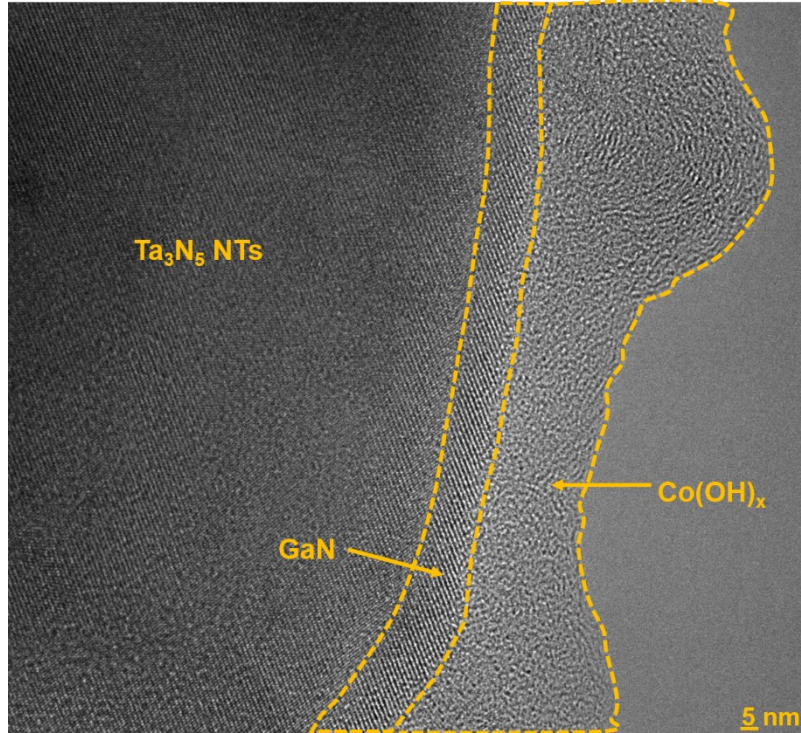

**Figure S1.** Bright-field (HAADF-TEM) image representing the interfaces in the Co(OH)<sub>x</sub>/GaN/Sn doped Ta<sub>3</sub>N<sub>5</sub> NTs film.

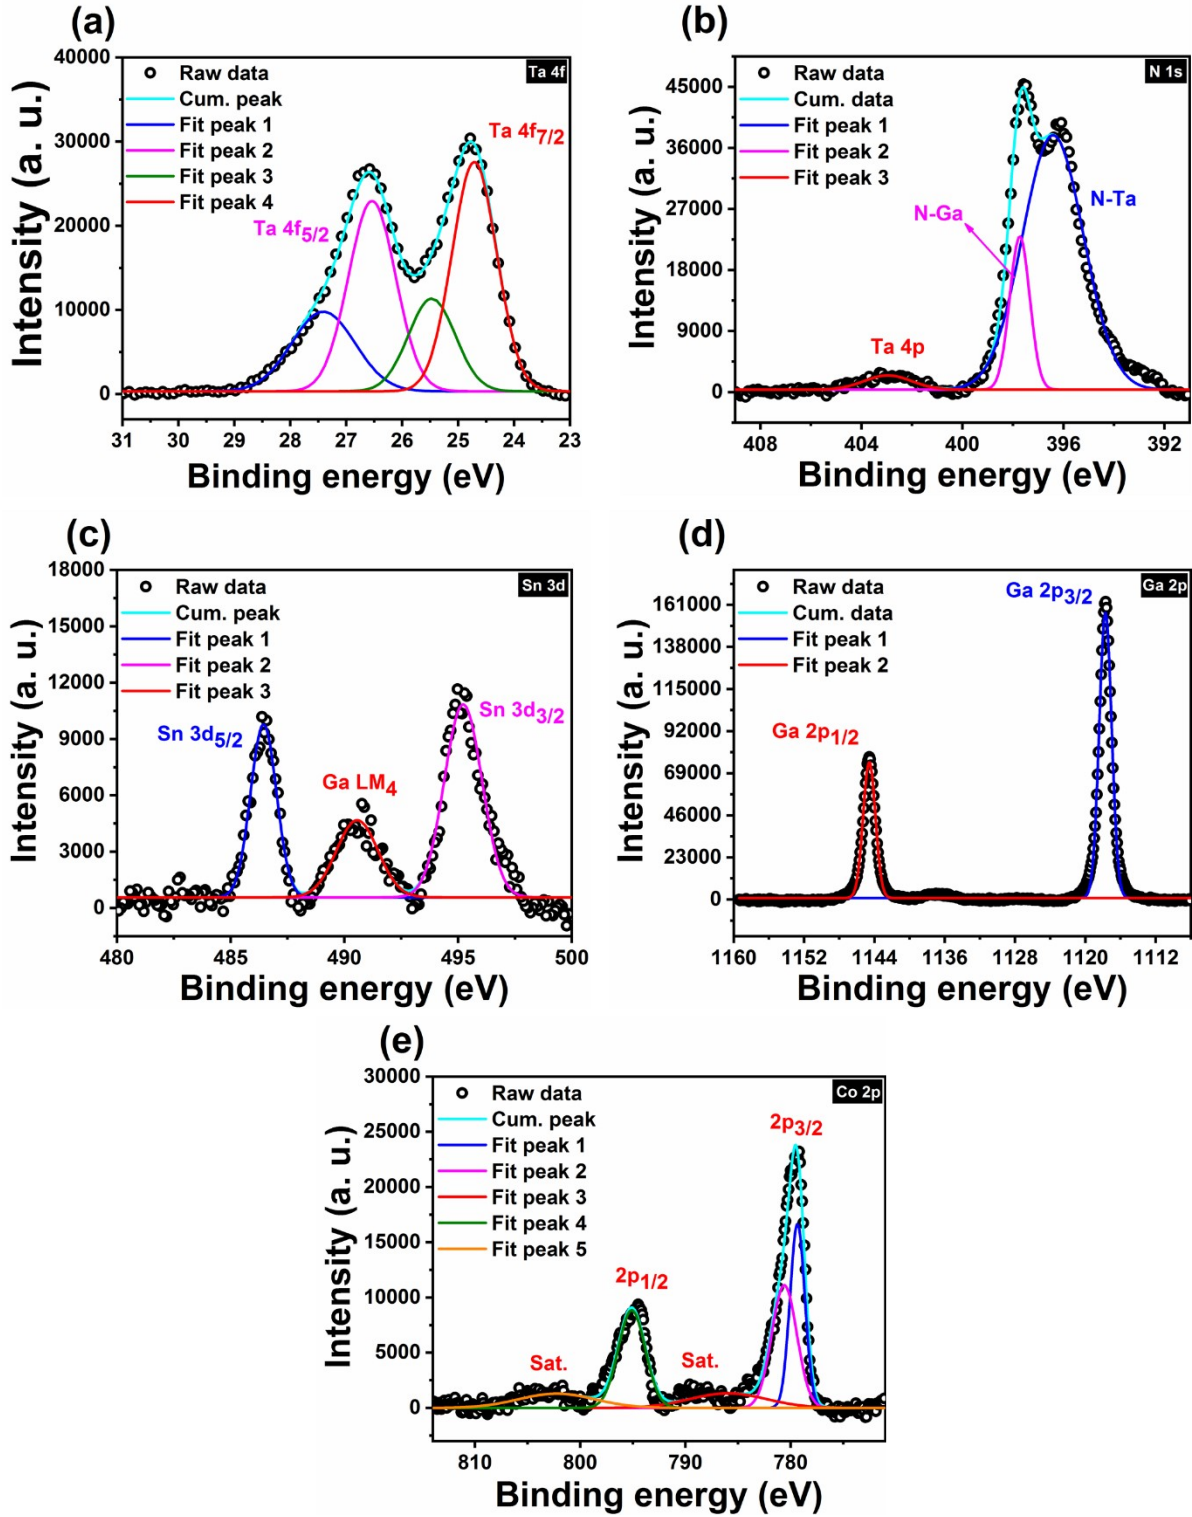

**Figure S2.** Core-level XPS spectra of (a) Ta4f, (b) N1s, (c) Sn3d, (d) Ga2p, and (e) Co2p of Co(OH)<sub>x</sub>/GaN/Sn doped Ta<sub>3</sub>N<sub>5</sub> NTs film after the PEC test.

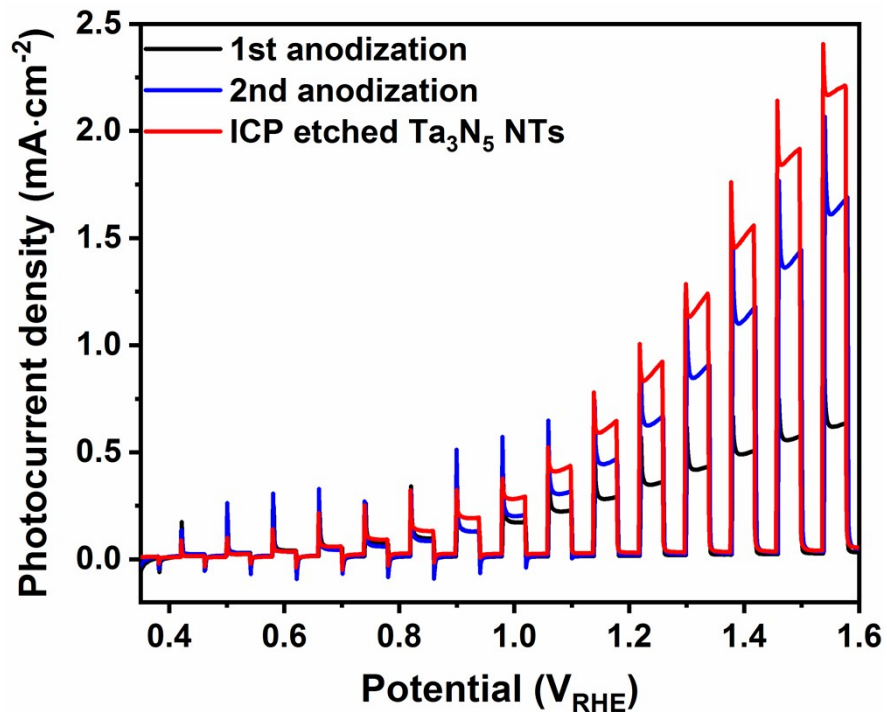

**Figure S3.** Chopped LSV curves of 1<sup>st</sup> and 2<sup>nd</sup> anodization and ICP etched of bare Ta<sub>3</sub>N<sub>5</sub> NTs films.

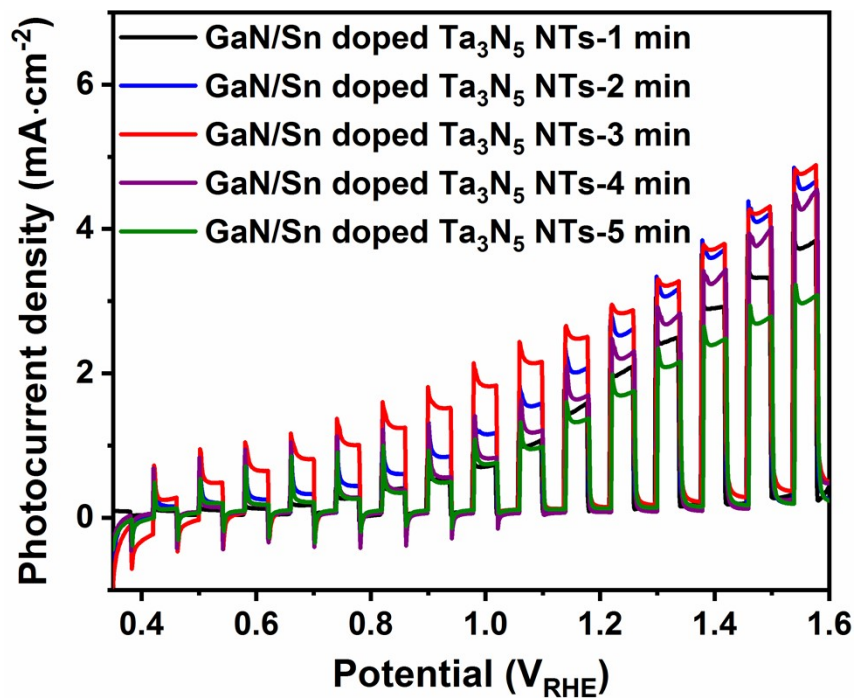

**Figure S4.** Chopped LSV curves of GaN/Sn doped Ta<sub>3</sub>N<sub>5</sub> NTs films at different electrodeposition times from 1min to 5min by chronoamperometric method.

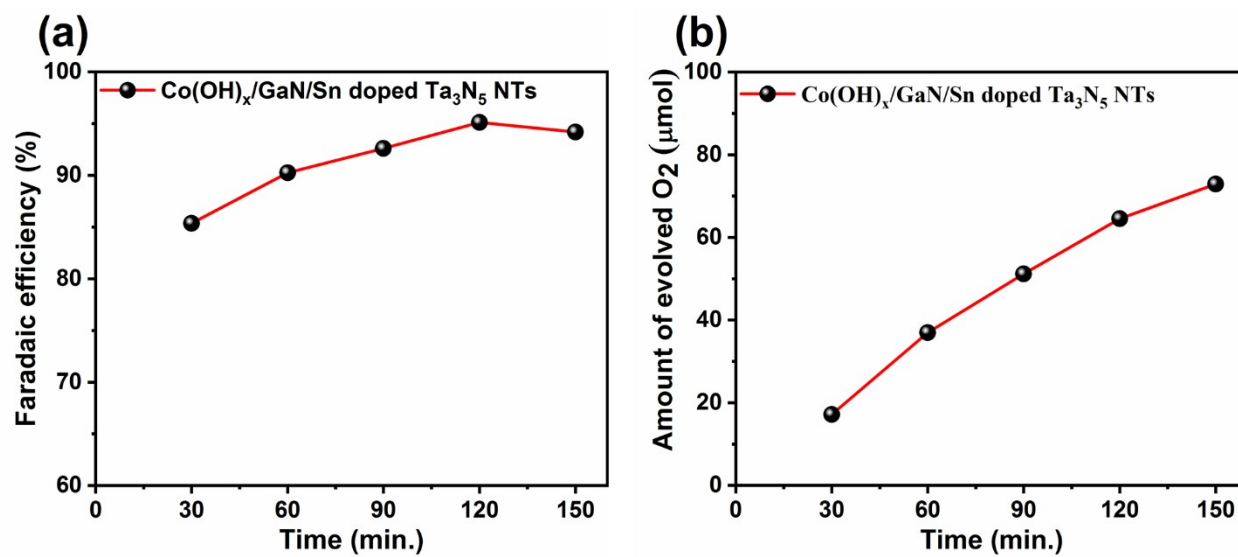

**Figure S5.** (a) Faradaic efficiency and (b) quantities of the detected O<sub>2</sub> gas in a PEC system from the Co(OH)<sub>x</sub>/GaN/Sn doped Ta<sub>3</sub>N<sub>5</sub> NTs photoanode as the working electrode under applied voltages of 1.23 V<sub>RHE</sub> in 0.5 M NaOH solution at pH 12.5.

**Table S1.** The previous reported Ta<sub>3</sub>N<sub>5</sub>-based photoanodes are compared in below Table.

| <b>Material</b>                               | <b>Fabrication Method</b>                                          | <b>Surface Modification</b>                         | <b>IPCE &amp; <math>J</math> (mA/cm<sup>2</sup>) at 1.23 V<sub>RHE</sub></b>               | <b>Ref.</b>      |
|-----------------------------------------------|--------------------------------------------------------------------|-----------------------------------------------------|--------------------------------------------------------------------------------------------|------------------|
| Ba doped Ta <sub>3</sub> N <sub>5</sub>       | Mask anodization and nitridation of Ta foil                        | Co-Pi                                               | 6.7 mA cm <sup>-2</sup> (0.5 M KPi)                                                        | 41               |
| Mg-Zr codoped Ta <sub>3</sub> N <sub>5</sub>  | Particle transfer                                                  | FeO <sub>x</sub> + CoO <sub>x</sub>                 | 2.3 mA cm <sup>-2</sup> (0.1 M Na <sub>2</sub> SO <sub>4</sub> )                           | 79               |
| Ta <sub>3</sub> N <sub>5</sub>                | Hydrothermal and nitridation of Ta foil                            | Co(OH) <sub>2</sub> /Co <sub>3</sub> O <sub>4</sub> | 3.64 mA cm <sup>-2</sup> (1 M NaOH)                                                        | 80               |
| Ta <sub>3</sub> N <sub>5</sub>                | Hydrothermal and nitridation of Ta foil                            | Co(OH) <sub>x</sub>                                 | 2.8 mA/cm <sup>2</sup> (1 M NaOH)                                                          | 81               |
| Ta <sub>3</sub> N <sub>5</sub>                | Sputtering and nitridation of TaO <sub>5</sub> on Ta substrate     | GaN/Co-Pi                                           | 8 mA cm <sup>-2</sup> at 1.2 V <sub>RHE</sub> (0.5 M KPi)                                  | 52               |
| Ta <sub>3</sub> N <sub>5</sub>                | Electrophoretic deposition                                         | Co <sub>3</sub> O <sub>4</sub> /Co(OH) <sub>x</sub> | 3.18 mA/cm <sup>2</sup> at 1.2 V <sub>RHE</sub> (1 M NaOH)                                 | 82               |
| Ta <sub>3</sub> N <sub>5</sub>                | Anodization and nitridation of Ta foil                             | MgO/Co(OH) <sub>x</sub>                             | 5.5 mA cm <sup>-2</sup> (1 M NaOH)                                                         | 83               |
| Ta <sub>3</sub> N <sub>5</sub>                | Anodization, hydrothermal and nitridation of Ta foil               | Ni(OH) <sub>x</sub> /Fh/TiO <sub>x</sub>            | 12.1 mA cm <sup>-2</sup> (1 M NaOH)                                                        | 49               |
| Ta <sub>3</sub> N <sub>5</sub>                | Sputtering (magnetron GLAD system)                                 | FeNiO <sub>x</sub>                                  | 9.95 mA cm <sup>-2</sup> at 1.05 V <sub>RHE</sub> (0.5 M K <sub>2</sub> HPO <sub>4</sub> ) | 53               |
| In:GaN/Ta <sub>3</sub> N <sub>5</sub> /Mg:GaN | Electron beam evaporation, atomic layer deposition and nitridation | NiCoFe-B <sub>i</sub>                               | 9.3 mA cm <sup>-2</sup> (1 M KOH)                                                          | 54               |
| Mg doped Ta <sub>3</sub> N <sub>5</sub>       | Electron beam evaporation and nitridation                          | NiCoFe-B <sub>i</sub>                               | 8.5 mA cm <sup>-2</sup> (1 M KOH)                                                          | 84               |
| <b>Sn doped Ta<sub>3</sub>N<sub>5</sub></b>   | <b>Anodization and nitridation of Ta foil, electrodeposition</b>   | <b>GaN/Co(OH)<sub>x</sub></b>                       | <b>39%, 4.58 mA cm<sup>-2</sup> (0.5 M NaOH)</b>                                           | <b>This work</b> |
